# Supplementary material for: Complete genome assembly and characterization of an outbreak strain of the causative agent of swine erysipelas – Erysipelothrix rhusiopathiae SY1027
Source: PubMed Central journal article supplement (PMC4105556; doi:10.1186/1471-2180-14-176), 2014-07-02
Supplement: 1471-2180-14-176-S3.pdf [file 1471-2180-14-176-S3.pdf]

| COG class | Number of COG class | Percentage of COG class | Class Function                                                | COG class | Number of COG class | Percentage of COG class | COG class | Number of COG class | Percentage of COG class |
|-----------|---------------------|-------------------------|---------------------------------------------------------------|-----------|---------------------|-------------------------|-----------|---------------------|-------------------------|
| [R]       | 292                 | 12.08                   | General function prediction only                              | [TK]      | 22                  | 0.91                    | [LU]      | 2                   | 0.08                    |
| [J]       | 276                 | 11.41                   | Translation, ribosomal structure and biogenesis               | [KR]      | 16                  | 0.66                    | [CP]      | 2                   | 0.08                    |
| [G]       | 218                 | 9.02                    | Carbohydrate transport and metabolism                         | [KG]      | 14                  | 0.58                    | [FGR]     | 2                   | 0.08                    |
| [L]       | 206                 | 8.52                    | Replication, recombination and repair                         | [KT]      | 12                  | 0.50                    | [NT]      | 2                   | 0.08                    |
| [S]       | 176                 | 7.28                    | Function unknown                                              | [GEPR]    | 12                  | 0.50                    | [EM]      | 2                   | 0.08                    |
| [K]       | 150                 | 6.20                    | Transcription                                                 | [MG]      | 10                  | 0.41                    | [IQR]     | 2                   | 0.08                    |
| [P]       | 132                 | 5.46                    | Inorganic ion transport and metabolism                        | [Q]       | 8                   | 0.33                    | [NU]      | 2                   | 0.08                    |
| [E]       | 128                 | 5.29                    | Amino acid transport and metabolism                           | [LKJ]     | 8                   | 0.33                    | [IQ]      | 2                   | 0.08                    |
| [V]       | 112                 | 4.63                    | Defense mechanisms                                            | [EP]      | 6                   | 0.25                    | [ET]      | 2                   | 0.08                    |
| [M]       | 104                 | 4.30                    | Cell wall/membrane/envelope biogenesis                        | [QR]      | 6                   | 0.25                    | [KL]      | 2                   | 0.08                    |
| [C]       | 98                  | 4.05                    | Energy production and conversion                              | [HI]      | 6                   | 0.25                    | [EH]      | 2                   | 0.08                    |
| [F]       | 92                  | 3.80                    | Nucleotide transport and metabolism                           | [CHR]     | 6                   | 0.25                    | [CO]      | 2                   | 0.08                    |
| [O]       | 74                  | 3.06                    | Posttranslational modification, protein turnover, chaperones  | [LK]      | 4                   | 0.17                    | [LR]      | 2                   | 0.08                    |
| [T]       | 46                  | 1.90                    | Signal transduction mechanisms                                | [OC]      | 4                   | 0.17                    | [EF]      | 2                   | 0.08                    |
| [H]       | 44                  | 1.82                    | Coenzyme transport and metabolism                             | [GT]      | 4                   | 0.17                    | [TQ]      | 2                   | 0.08                    |
| [I]       | 36                  | 1.49                    | Lipid transport and metabolism                                | [IR]      | 4                   | 0.17                    | [FE]      | 2                   | 0.08                    |
| [D]       | 30                  | 1.24                    | Cell cycle control, cell division, chromosome partitioning    | [MU]      | 2                   | 0.08                    | [CR]      | 2                   | 0.08                    |
| [U]       | 24                  | 0.99                    | Intracellular trafficking, secretion, and vesicular transport | [MI]      | 2                   | 0.08                    |           |                     |                         |
