# Supplementary material for: Complete genome assembly and characterization of an outbreak strain of the causative agent of swine erysipelas – Erysipelothrix rhusiopathiae SY1027
Source: PubMed Central journal article supplement (PMC4105556; doi:10.1186/1471-2180-14-176), 2014-07-02

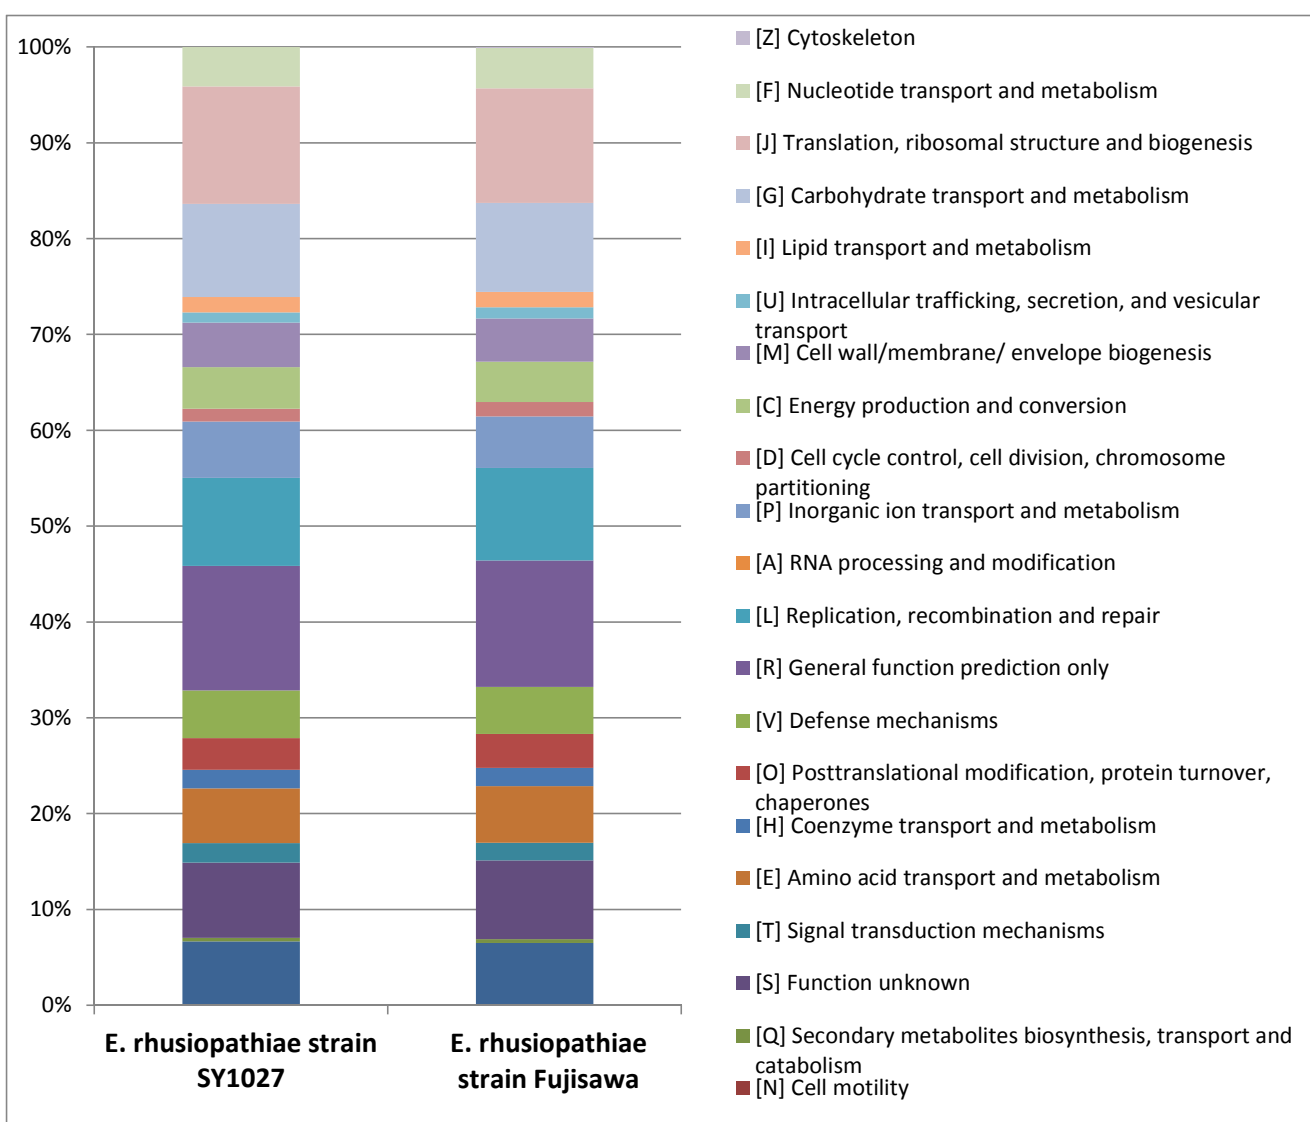

Supplement: 1471-2180-14-176-S5.pdf [file 1471-2180-14-176-S5.pdf]
