# Supplementary material for: Complete genome assembly and characterization of an outbreak strain of the causative agent of swine erysipelas – Erysipelothrix rhusiopathiae SY1027
Source: PubMed Central journal article supplement (PMC4105556; doi:10.1186/1471-2180-14-176), 2014-07-02
Supplement: 1471-2180-14-176-S6.pdf [file 1471-2180-14-176-S6.pdf]

| [COG class] function description                                  | <i>Erysipelothrix rhusiopathiae</i> strain SY1027 |        | <i>Erysipelothrix rhusiopathiae</i> strain Fujisawa |        |
|-------------------------------------------------------------------|---------------------------------------------------|--------|-----------------------------------------------------|--------|
|                                                                   | no. of ORF                                        | %      | no. of ORF                                          | %      |
| [K] Transcription                                                 | 75                                                | 6.203  | 68                                                  | 6.055  |
| [N] Cell motility                                                 | 0                                                 | 0.000  | 0                                                   | 0.000  |
| [Q] Secondary metabolites biosynthesis, transport and catabolism  | 4                                                 | 0.331  | 4                                                   | 0.356  |
| [S] Function unknown                                              | 88                                                | 7.279  | 86                                                  | 7.658  |
| [T] Signal transduction mechanisms                                | 23                                                | 1.902  | 19                                                  | 1.692  |
| [E] Amino acid transport and metabolism                           | 64                                                | 5.294  | 62                                                  | 5.521  |
| [H] Coenzyme transport and metabolism                             | 22                                                | 1.820  | 20                                                  | 1.781  |
| [O] Posttranslational modification, protein turnover, chaperones  | 37                                                | 3.060  | 37                                                  | 3.295  |
| [V] Defense mechanisms                                            | 56                                                | 4.632  | 51                                                  | 4.541  |
| [R] General function prediction only                              | 146                                               | 12.076 | 138                                                 | 12.289 |
| [L] Replication, recombination and repair                         | 103                                               | 8.519  | 101                                                 | 8.994  |
| [A] RNA processing and modification                               | 0                                                 | 0.000  | 0                                                   | 0.000  |
| [P] Inorganic ion transport and metabolism                        | 66                                                | 5.459  | 56                                                  | 4.987  |
| [D] Cell cycle control, cell division, chromosome partitioning    | 15                                                | 1.241  | 16                                                  | 1.425  |
| [C] Energy production and conversion                              | 49                                                | 4.053  | 44                                                  | 3.918  |
| [M] Cell wall/membrane/envelope biogenesis                        | 52                                                | 4.301  | 47                                                  | 4.185  |
| [U] Intracellular trafficking, secretion, and vesicular transport | 12                                                | 0.993  | 12                                                  | 1.069  |
| [I] Lipid transport and metabolism                                | 18                                                | 1.489  | 17                                                  | 1.514  |
| [G] Carbohydrate transport and metabolism                         | 109                                               | 9.016  | 97                                                  | 8.638  |
| [J] Translation, ribosomal structure and biogenesis               | 138                                               | 11.414 | 125                                                 | 11.131 |
| [F] Nucleotide transport and metabolism                           | 46                                                | 3.805  | 44                                                  | 3.918  |
| [Z] Cytoskeleton                                                  | 0                                                 | 0.000  | 1                                                   | 0.089  |
