# Supplementary material for: Complete genome assembly and characterization of an outbreak strain of the causative agent of swine erysipelas – Erysipelothrix rhusiopathiae SY1027
Source: PubMed Central journal article supplement (PMC4105556; doi:10.1186/1471-2180-14-176), 2014-07-02
Supplement: 1471-2180-14-176-S8.pdf [file 1471-2180-14-176-S8.pdf]

| Locus Tag                                   | Size<br>(a.a.) | Alignment<br>length | % ID   | GenBank<br>accession no. | Gene description                                       |
|---------------------------------------------|----------------|---------------------|--------|--------------------------|--------------------------------------------------------|
| <b>Surface proteins</b>                     |                |                     |        |                          |                                                        |
| contig00001_orf00166                        | 1559           | 1556                | 97.94  | ZP_08081965              | Family 85 glycosyl hydrolase                           |
| contig00001_orf00230^                       | 1005           | 1003                | 99.60  | YP_004560766             | Surface protein A (rspA)                               |
| contig00001_orf00232^                       | 971            | 945                 | 99.89  | YP_004560766             | Surface protein A (rspA)                               |
| contig00001_orf00233                        | 790            | 790                 | 100.00 | YP_004560767             | Surface protein B (rspB)                               |
| contig00001_orf00308                        | 510            | 510                 | 99.80  | YP_004560825             | Leucine-rich repeat protein                            |
| contig00001_orf00352                        | 1557           | 1533                | 100.00 | YP_004560861             | hyaluronidase (hyl B)                                  |
| contig00001_orf00355                        | 607            | 586                 | 100.00 | YP_004560864             | Choline-binding protein                                |
| contig00001_orf00364                        | 588            | 584                 | 98.47  | YP_004560873             | Dipeptidase                                            |
| contig00001_orf00807                        | 754            | 721                 | 99.86  | YP_004561235             | 5'-nucleotidase                                        |
| contig00001_orf00890                        | 850            | 838                 | 99.88  | YP_004561305             | hyaluronidase (hyl C)                                  |
| contig00001_orf00949                        | 102            | 98                  | 91.84  | YP_004561353             | Hypothetical protein                                   |
| contig00001_orf01192                        | 1308           | 1308                | 100.00 | YP_004561530             | collagen-binding protein                               |
| contig00001_orf01214                        | 726            | 726                 | 100.00 | YP_004561548             | LPXTG-motif cell wall anchor domain-containing protein |
| contig00001_orf01488                        | 1062           | 1059                | 100.00 | YP_004561780             | Surface protein C (rspC)                               |
| contig00001_orf01594                        | 1773           | 1773                | 99.94  | YP_004560175             | collagen-binding protein                               |
| contig00001_orf01621                        | 627            | 626                 | 99.68  | YP_004560194             | spaA                                                   |
| contig00001_orf01689                        | 1034           | 1034                | 100.00 | YP_004560250             | hyaluronidase (hyl A)                                  |
| contig00001_orf01700                        | 1174           | 1174                | 99.91  | YP_004560261             | Peptidase M14                                          |
| contig00001_orf01704                        | 1487           | 1487                | 99.93  | YP_004560265             | Pectin lyase fold-containing protein                   |
| contig00001_orf01831                        | 632            | 632                 | 100.00 | YP_004560378             | LPXTG-motif cell wall anchor domain-containing protein |
| contig00001_orf01852                        | 1198           | 1198                | 99.92  | YP_004560398             | neuraminidase                                          |
| <b>Antioxidant proteins</b>                 |                |                     |        |                          |                                                        |
| contig00001_orf00708                        | 203            | 203                 | 100.00 | YP_004561161             | sodA superoxide dismutase                              |
| contig00001_orf01039                        | 292            | 292                 | 100.00 | YP_004561405             | trxB.1 thioredoxin-disulfide reductase                 |
| contig00001_orf01077                        | 118            | 118                 | 100.00 | YP_004561439             | ahpD alkylhydroperoxidase-like                         |
| contig00001_orf01270                        | 102            | 102                 | 100.00 | YP_004561594             | trxA.2 thioredoxin                                     |
| contig00001_orf01317                        | 311            | 311                 | 100.00 | YP_004561635             | trxB.2 thioredoxin-disulfide reductase                 |
| contig00001_orf01701                        | 162            | 162                 | 100.00 | YP_004560262             | tpx thiol peroxidase                                   |
| contig00001_orf01717                        | 221            | 221                 | 100.00 | YP_004560275             | ahpC alkyl-hydroperoxide reductase                     |
| contig00001_orf01922                        | 69             | 69                  | 100.00 | YP_004560455             | nrdH glutaredoxin-like protein NrdH                    |
| contig00001_orf01943                        | 103            | 103                 | 100.00 | YP_004560474             | trxA.1 thioredoxin                                     |
| <b>Phospholipase</b>                        |                |                     |        |                          |                                                        |
| contig00001_orf01588                        | 302            | 302                 | 100.00 | YP_004560172             | patatin-like phospholipase                             |
| contig00001_orf01607                        | 197            | 197                 | 100.00 | YP_004560183             | phospholipase/carboxylesterase family protein          |
| contig00001_orf01686                        | 275            | 275                 | 100.00 | YP_004560248             | pldB lysophospholipase                                 |
| contig00001_orf01892                        | 508            | 508                 | 100.00 | YP_004560432             | cls cardiolipin synthetase                             |
| contig00001_orf01893                        | 284            | 284                 | 100.00 | YP_004560433             | patatin-like phospholipase                             |
| contig00001_orf01910                        | 200            | 200                 | 100.00 | YP_004560446             | phospholipase/carboxylesterase                         |
| <b>Hemolysins</b>                           |                |                     |        |                          |                                                        |
| contig00001_orf00060                        | 424            | 424                 | 100.00 | YP_004560565             | hemolysin-like protein                                 |
| contig00001_orf00209                        | 219            | 219                 | 100.00 | YP_004560747             | hemolysin III                                          |
| <b>Other extracellular proteins/enzymes</b> |                |                     |        |                          |                                                        |
| contig00001_orf00348                        | 407            | 407                 | 100.00 | YP_004560857             | nanH.2 neuraminidase                                   |
| contig00001_orf00669                        | 193            | 193                 | 100.00 | YP_004561130             | fibronectin-binding protein                            |
| contig00001_orf01091                        | 292            | 292                 | 100.00 | YP_004561450             | ABC transporter metal-binding                          |
| contig00001_orf01232                        | 493            | 493                 | 88.03  | YP_004561561             | putative biofilm-associated surface protein            |
| <b>Capsular polysaccharide biosynthesis</b> |                |                     |        |                          |                                                        |
| contig00001_orf00461^                       | 442            | 442                 | 100.00 | YP_004560951             | exopolysaccharide biosynthesis polyprenyl              |
| contig00001_orf00463^                       | 502            | 502                 | 99.80  | YP_004560952             | putative O-antigen polymerase                          |
| contig00001_orf00464                        | 401            | 401                 | 100.00 | YP_004560953             | glycosyltransferase                                    |
| contig00001_orf00465^                       | 337            | 337                 | 100.00 | YP_004560954             | UDP-glucose 4-epimerase                                |
| contig00001_orf00467^                       | 293            | 293                 | 100.00 | YP_004560955             | NAD-dependent                                          |
| contig00001_orf00468                        | 374            | 374                 | 100.00 | YP_004560956             | UDP-N-acetylglucosamine 2-epimerase                    |
| contig00001_orf00469                        | 391            | 390                 | 100.00 | YP_004560957             | glycosyltransferase                                    |
