# Supplementary material for: Complete genome assembly and characterization of an outbreak strain of the causative agent of swine erysipelas – Erysipelothrix rhusiopathiae SY1027
Source: PubMed Central journal article supplement (PMC4105556; doi:10.1186/1471-2180-14-176), 2014-07-02
Supplement: 1471-2180-14-176-S9.pdf [file 1471-2180-14-176-S9.pdf]

| Species and contigs in<br><i>E. rhusiopathiae</i> SY1027 | ARDB best hit |               |       |                            |                                                                                                                                                            | Ortholog in<br>strain Fujisawa |
|----------------------------------------------------------|---------------|---------------|-------|----------------------------|------------------------------------------------------------------------------------------------------------------------------------------------------------|--------------------------------|
|                                                          | Match ID (%)  | Accession no. | Gene  | Potential<br>resistance to | Description on ARDB                                                                                                                                        |                                |
| contig00001_orf00313                                     | 40.10         | NP_836538     | macb  | macrolide                  | macrolide<br>transporter/permease                                                                                                                          | YP_004560830                   |
| contig00001_orf00863                                     | 41.84         | YP_001176128  | macb  | macrolide                  | macrolide<br>transporter/permease                                                                                                                          | YP_004561283                   |
| contig00001_orf01097                                     | 40.36         | YP_001334578  | macb  | macrolide                  | macrolide<br>transporter/permease                                                                                                                          | YP_004561455                   |
| contig00001_orf01260                                     | 43.06         | NP_836538     | macb  | macrolide                  | macrolide<br>transporter/permease                                                                                                                          | YP_004561586                   |
| contig00001_orf01760                                     | 42.06         | ABA71727      | vanrg | vancomycin                 | VanG type vancomycin<br>resistance operon genes, which<br>can synthesize peptidoglycan<br>with modified C-terminal D-Ala-<br>D-Ala to D-alanine--D-serine. | YP_004560311                   |
| contig00001_orf01866                                     | 45.18         | AAL27445      | vanre | vancomycin                 | VanE type vancomycin<br>resistance operon genes, which<br>can synthesize peptidoglycan<br>with modified C-terminal D-Ala-<br>D-Ala to D-alanine--D-serine. | YP_004560408                   |
| contig00001_orf01870                                     | 46.86         | AAY52009      | vanra | teicoplanin                | Unknown                                                                                                                                                    | YP_004560411                   |
